# Supplementary material
Source: ML conference proceedings conference paper supplement (https://openaccess.thecvf.com/content/CVPR_2019/html/Fan_LaSOT_A_High-Quality_CVPR_2019_paper.html)
Supplement: Supplementary file 1 [file Fan_LaSOT_A_High-Quality_CVPR_2019_supplemental.pdf]

# LaSOT: A High-quality Benchmark for Large-scale Single Object Tracking

## —Supplementary Material—

Table 1. Details of 70 object categories in LaSOT and comparison with existing dense benchmark. Best viewed when zoomed-in.

| NUS-PRO [4] |           | OTB-2015 [71] |           | TC-128 [5] |           | UAV123 [6] |           | VOT-17 [3] |           | NIS [2]      |           | LaSOT        |           |
|-------------|-----------|---------------|-----------|------------|-----------|------------|-----------|------------|-----------|--------------|-----------|--------------|-----------|
| class       | # entries | class         | # entries | class      | # entries | class      | # entries | class      | # entries | class        | # entries | class        | # entries |
| person      | 193       | person        | 36        | person     | 45        | person     | 48        | person     | 19        | ball         | 21        | airplane     | 20        |
| head        | 60        | head          | 26        | head       | 16        | car        | 30        | head       | 5         | person       | 20        | basketball   | 20        |
| car         | 31        | car           | 12        | sphere     | 8         | drone      | 10        | fish       | 4         | animal       | 10        | bear         | 20        |
| airplane    | 20        | toy           | 8         | 2D print   | 5         | wakeboard  | 10        | motorcycle | 4         | vehicle      | 9         | bicycle      | 20        |
| boat        | 20        | 2D print      | 4         | bicycle    | 5         | boat       | 9         | car        | 3         | shuffleboard | 8         | bird         | 20        |
| helicopter  | 20        | cuboid        | 3         | car        | 5         | building   | 5         | drone      | 3         | face         | 6         | boat         | 20        |
| motorcycle  | 20        | bird          | 2         | ball       | 4         | truck      | 5         | ant        | 2         | cup          | 4         | book         | 20        |
| drone       | 1         | motorcycle    | 1         | toy        | 4         | bicycle    | 3         | ball       | 2         | dollar       | 4         | bottle       | 20        |
| -           | -         | deer          | 1         | hand       | 3         | bird       | 3         | bird       | 2         | aircraft     | 4         | bus          | 20        |
| -           | -         | bottle        | 1         | kite       | 3         | -          | -         | toy        | 2         | airboard     | 2         | car          | 20        |
| -           | -         | panda         | 1         | logo       | 3         | -          | -         | bag        | 1         | fish         | 2         | cat          | 20        |
| -           | -         | board         | 1         | cuboid     | 3         | -          | -         | book       | 1         | motorcycle   | 2         | cattle       | 20        |
| -           | -         | can           | 1         | boat       | 2         | -          | -         | butterfly  | 1         | drone        | 2         | chameleon    | 20        |
| -           | -         | dog           | 1         | cup        | 2         | -          | -         | cable      | 1         | bicycle      | 2         | coab         | 20        |
| -           | -         | transformer   | 1         | fish       | 2         | -          | -         | crab       | 1         | bird         | 2         | crab         | 20        |
| -           | -         | bicycle       | 1         | guitar     | 2         | -          | -         | cat        | 1         | bag          | 1         | crocodile    | 20        |
| -           | -         | -             | -         | bird       | 2         | -          | -         | flamingo   | 1         | yoyo         | 1         | cup          | 20        |
| -           | -         | -             | -         | microphone | 2         | -          | -         | frisbee    | 1         | -            | -         | deer         | 20        |
| -           | -         | -             | -         | torso      | 2         | -          | -         | glove      | 1         | -            | -         | dog          | 20        |
| -           | -         | -             | -         | motorcycle | 2         | -          | -         | hand       | 1         | -            | -         | drone        | 20        |
| -           | -         | -             | -         | airplane   | 2         | -          | -         | helicopter | 1         | -            | -         | electricFan  | 20        |
| -           | -         | -             | -         | board      | 1         | -          | -         | leaf       | 1         | -            | -         | elephant     | 20        |
| -           | -         | -             | -         | bottle     | 1         | -          | -         | rabbit     | 1         | -            | -         | flag         | 20        |
| -           | -         | -             | -         | can        | 1         | -          | -         | sheep      | 1         | -            | -         | fox          | 20        |
| -           | -         | -             | -         | deer       | 1         | -          | -         | -          | -         | -            | -         | frog         | 20        |
| -           | -         | -             | -         | ring       | 1         | -          | -         | -          | -         | -            | -         | gameTarget   | 20        |
| -           | -         | -             | -         | torus      | 1         | -          | -         | -          | -         | -            | -         | gecko        | 20        |
| -           | -         | -             | -         | -          | -         | -          | -         | -          | -         | -            | -         | giraffe      | 20        |
| -           | -         | -             | -         | -          | -         | -          | -         | -          | -         | -            | -         | goldfish     | 20        |
| -           | -         | -             | -         | -          | -         | -          | -         | -          | -         | -            | -         | gorilla      | 20        |
| -           | -         | -             | -         | -          | -         | -          | -         | -          | -         | -            | -         | guitar       | 20        |
| -           | -         | -             | -         | -          | -         | -          | -         | -          | -         | -            | -         | hand         | 20        |
| -           | -         | -             | -         | -          | -         | -          | -         | -          | -         | -            | -         | hat          | 20        |
| -           | -         | -             | -         | -          | -         | -          | -         | -          | -         | -            | -         | helmet       | 20        |
| -           | -         | -             | -         | -          | -         | -          | -         | -          | -         | -            | -         | hippo        | 20        |
| -           | -         | -             | -         | -          | -         | -          | -         | -          | -         | -            | -         | horse        | 20        |
| -           | -         | -             | -         | -          | -         | -          | -         | -          | -         | -            | -         | kangaroo     | 20        |
| -           | -         | -             | -         | -          | -         | -          | -         | -          | -         | -            | -         | kite         | 20        |
| -           | -         | -             | -         | -          | -         | -          | -         | -          | -         | -            | -         | leopard      | 20        |
| -           | -         | -             | -         | -          | -         | -          | -         | -          | -         | -            | -         | licensePlate | 20        |
| -           | -         | -             | -         | -          | -         | -          | -         | -          | -         | -            | -         | lion         | 20        |
| -           | -         | -             | -         | -          | -         | -          | -         | -          | -         | -            | -         | lizard       | 20        |
| -           | -         | -             | -         | -          | -         | -          | -         | -          | -         | -            | -         | microphone   | 20        |
| -           | -         | -             | -         | -          | -         | -          | -         | -          | -         | -            | -         | monkey       | 20        |
| -           | -         | -             | -         | -          | -         | -          | -         | -          | -         | -            | -         | motorcycle   | 20        |
| -           | -         | -             | -         | -          | -         | -          | -         | -          | -         | -            | -         | mouse        | 20        |
| -           | -         | -             | -         | -          | -         | -          | -         | -          | -         | -            | -         | person       | 20        |
| -           | -         | -             | -         | -          | -         | -          | -         | -          | -         | -            | -         | pig          | 20        |
| -           | -         | -             | -         | -          | -         | -          | -         | -          | -         | -            | -         | pool         | 20        |
| -           | -         | -             | -         | -          | -         | -          | -         | -          | -         | -            | -         | rabbit       | 20        |
| -           | -         | -             | -         | -          | -         | -          | -         | -          | -         | -            | -         | racing       | 20        |
| -           | -         | -             | -         | -          | -         | -          | -         | -          | -         | -            | -         | robot        | 20        |
| -           | -         | -             | -         | -          | -         | -          | -         | -          | -         | -            | -         | rubicCube    | 20        |
| -           | -         | -             | -         | -          | -         | -          | -         | -          | -         | -            | -         | sepia        | 20        |
| -           | -         | -             | -         | -          | -         | -          | -         | -          | -         | -            | -         | shark        | 20        |
| -           | -         | -             | -         | -          | -         | -          | -         | -          | -         | -            | -         | shark        | 20        |
| -           | -         | -             | -         | -          | -         | -          | -         | -          | -         | -            | -         | sheep        | 20        |
| -           | -         | -             | -         | -          | -         | -          | -         | -          | -         | -            | -         | skateboard   | 20        |
| -           | -         | -             | -         | -          | -         | -          | -         | -          | -         | -            | -         | spider       | 20        |
| -           | -         | -             | -         | -          | -         | -          | -         | -          | -         | -            | -         | squirrel     | 20        |
| -           | -         | -             | -         | -          | -         | -          | -         | -          | -         | -            | -         | surfboard    | 20        |
| -           | -         | -             | -         | -          | -         | -          | -         | -          | -         | -            | -         | swing        | 20        |
| -           | -         | -             | -         | -          | -         | -          | -         | -          | -         | -            | -         | tank         | 20        |
| -           | -         | -             | -         | -          | -         | -          | -         | -          | -         | -            | -         | tiger        | 20        |
| -           | -         | -             | -         | -          | -         | -          | -         | -          | -         | -            | -         | train        | 20        |
| -           | -         | -             | -         | -          | -         | -          | -         | -          | -         | -            | -         | truck        | 20        |
| -           | -         | -             | -         | -          | -         | -          | -         | -          | -         | -            | -         | turtle       | 20        |
| -           | -         | -             | -         | -          | -         | -          | -         | -          | -         | -            | -         | umbrella     | 20        |
| -           | -         | -             | -         | -          | -         | -          | -         | -          | -         | -            | -         | volleyball   | 20        |
| -           | -         | -             | -         | -          | -         | -          | -         | -          | -         | -            | -         | voyo         | 20        |

## 1. Details of 70 Object Categories in LaSOT and Comparison with Existing Dense Benchmarks

LaSOT consists of 70 object categories with each containing 20 videos, as shown in Tab. 1. Most of 70 classes are chosen from the 1,000 classes in ImageNet [1], with a few exceptions such as *drone* and *gametarget*, which are carefully selected by the experts for tracking. The selection of each category must be agreed upon by all the experts to ensure its usability for visual tracking. In addition, we also compare the object categories of different dense benchmarks. As shown in Tab. 1, the number of object categories in LaSOT is two times more than that of existing benchmarks (*e.g.*, TC-128 [5] with 27 classes). Moreover, LaSOT eliminates the category bias of dataset for tracking while others do not.

## 2. Traing/Testing Split in Protocol II

In protocol II, we split LaSOT into *training* and *testing* sets. The *training* set contains of 1,120 videos (*i.e.*, 16 sequences for each category) with 2.83M frames in total. The rest 280 videos (*i.e.*, 4 sequences for each category) with 690K frames are used for testing.

Table 2. Comparison between *training* and *testing* sets of LaSOT.

|                           | Video | Min frames | Mean frames | Median frames | Max frames | Total frames | Total duration |
|---------------------------|-------|------------|-------------|---------------|------------|--------------|----------------|
| LaSOT <sub>training</sub> | 1,120 | 1,000      | 2,529       | 2,043         | 11,397     | 2.83M        | 26.2 hours     |
| LaSOT <sub>testing</sub>  | 280   | 1,000      | 2,448       | 2,102         | 9,999      | 690K         | 6.3 hours      |
| LaSOT                     | 1,400 | 1,000      | 2,506       | 2,053         | 11,397     | 3.52M        | 32.5 hours     |

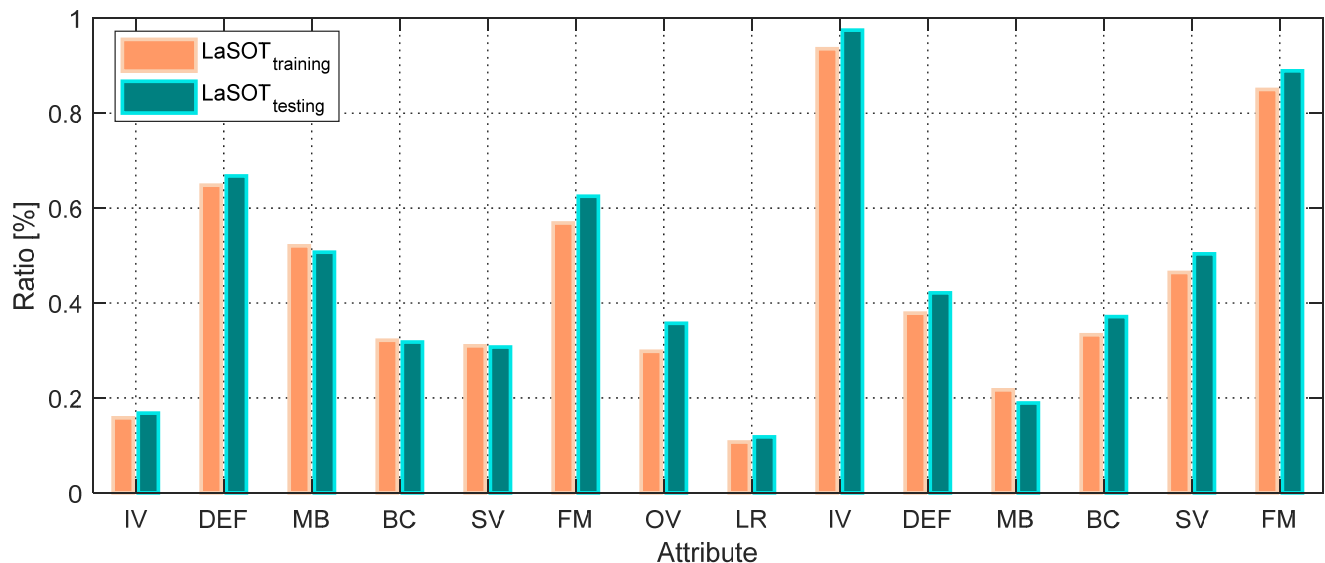

Figure 1. Comparison of sequence distribution in each attribute between *training* and *testing* sets. Best viewed in color.

Tab. 2 reports the detailed comparison between the *training* and the *testing* sets of LaSOT. We observe that the *min frames*, *mean frames*, *median frames* and *max frames* are similar between these two subsets. In addition, as shown in Fig. 1, we can see that the ratios of sequences in all 14 attributes are similar. Both Tab. 2 and Fig. 1 evidence the consistency of our training/testing split.

### 3. Detailed Attribute-based Performance under Protocol I

Fig. 2 shows the performance of trackers on each attribute using precision under protocol I.

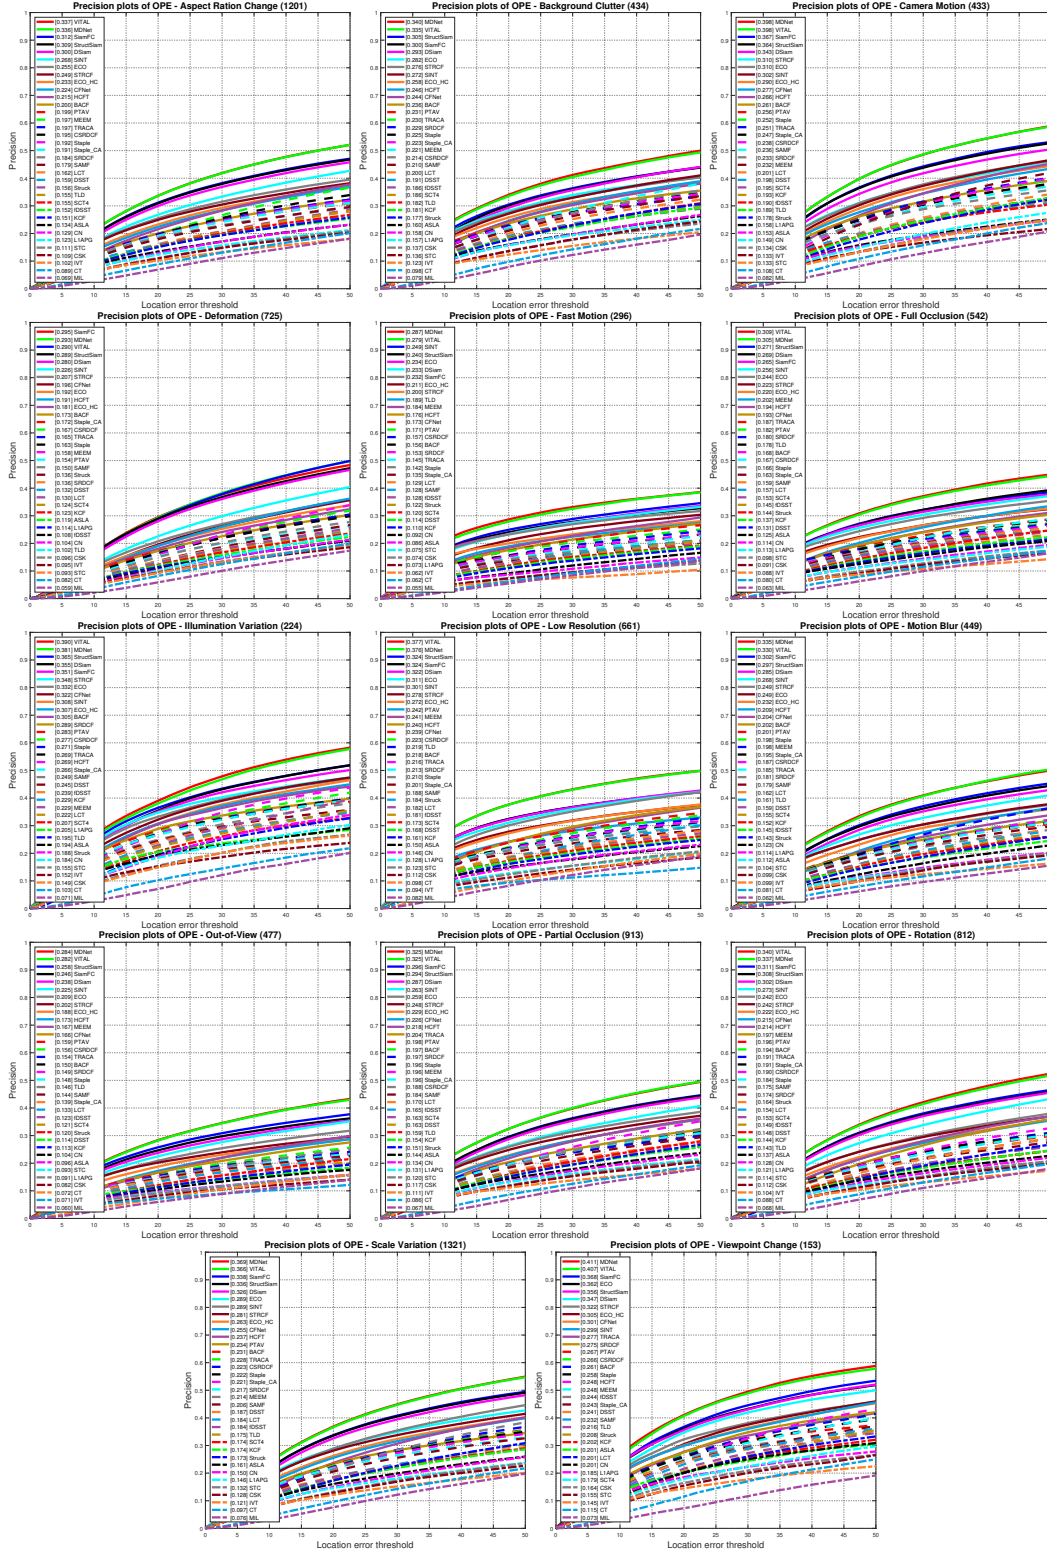

Figure 2. Performance of trackers on each attribute using precision under protocol I. Best viewed in color.

Fig. 3 shows the performance of trackers on each attribute using normalized precision under protocol I.

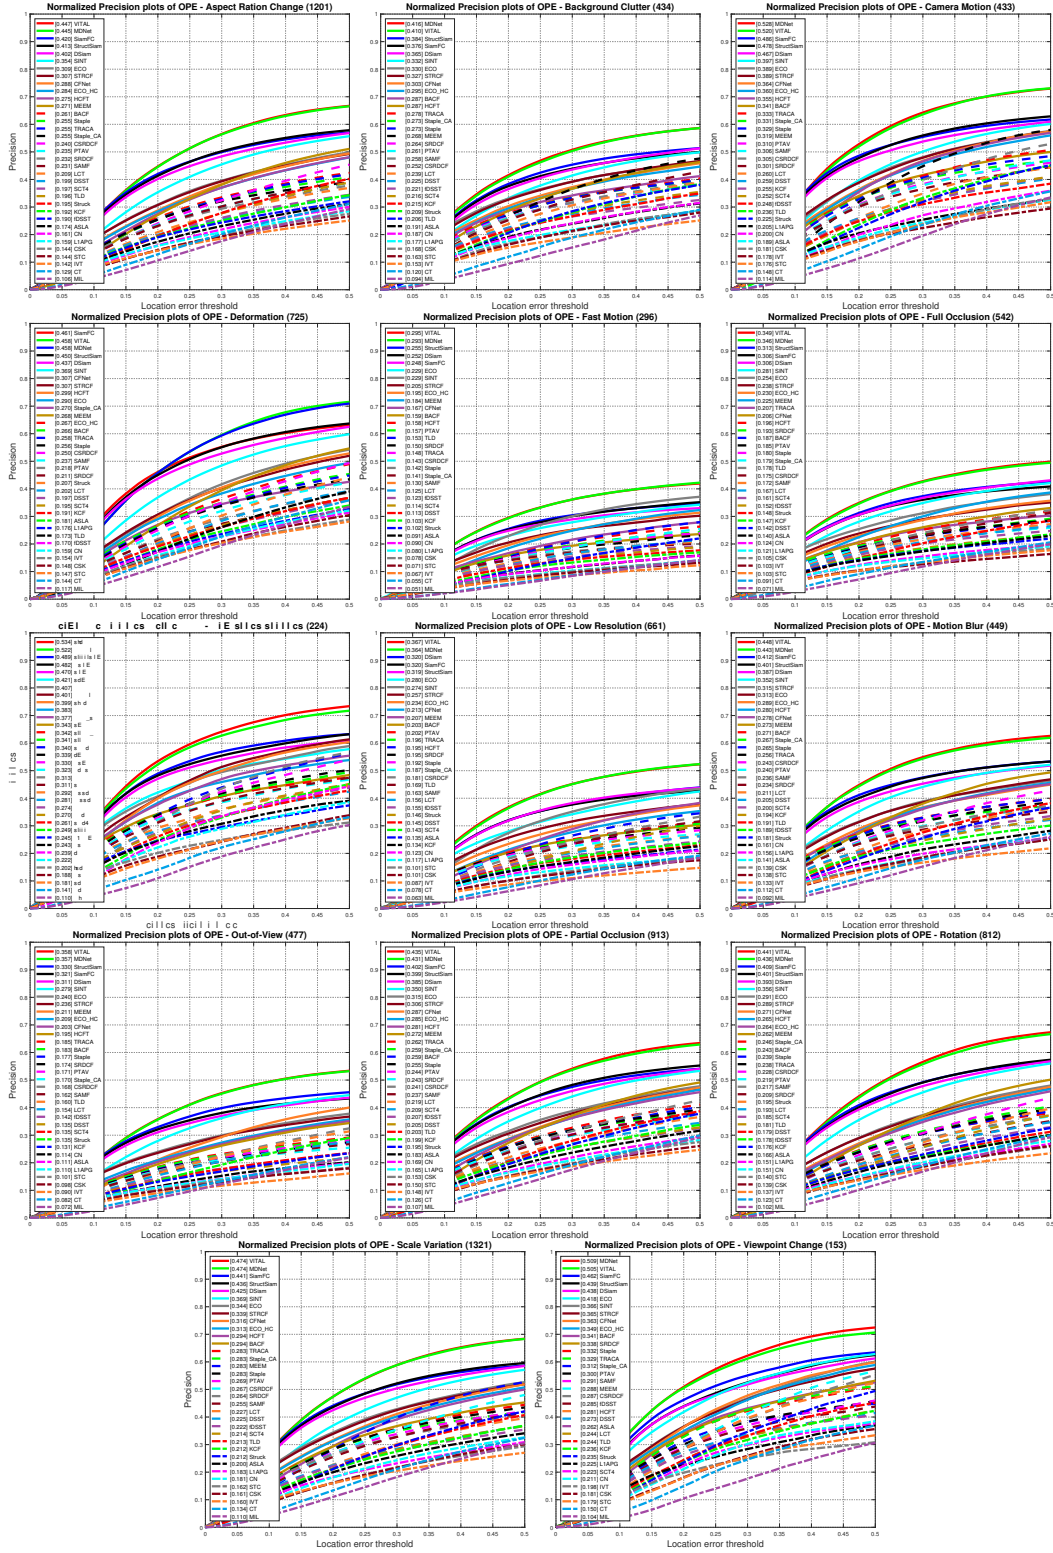

Figure 3. Performance of trackers on each attribute using precision under protocol I. Best viewed in color.



Fig. 4 shows the performance of trackers on each attribute using success under protocol I.

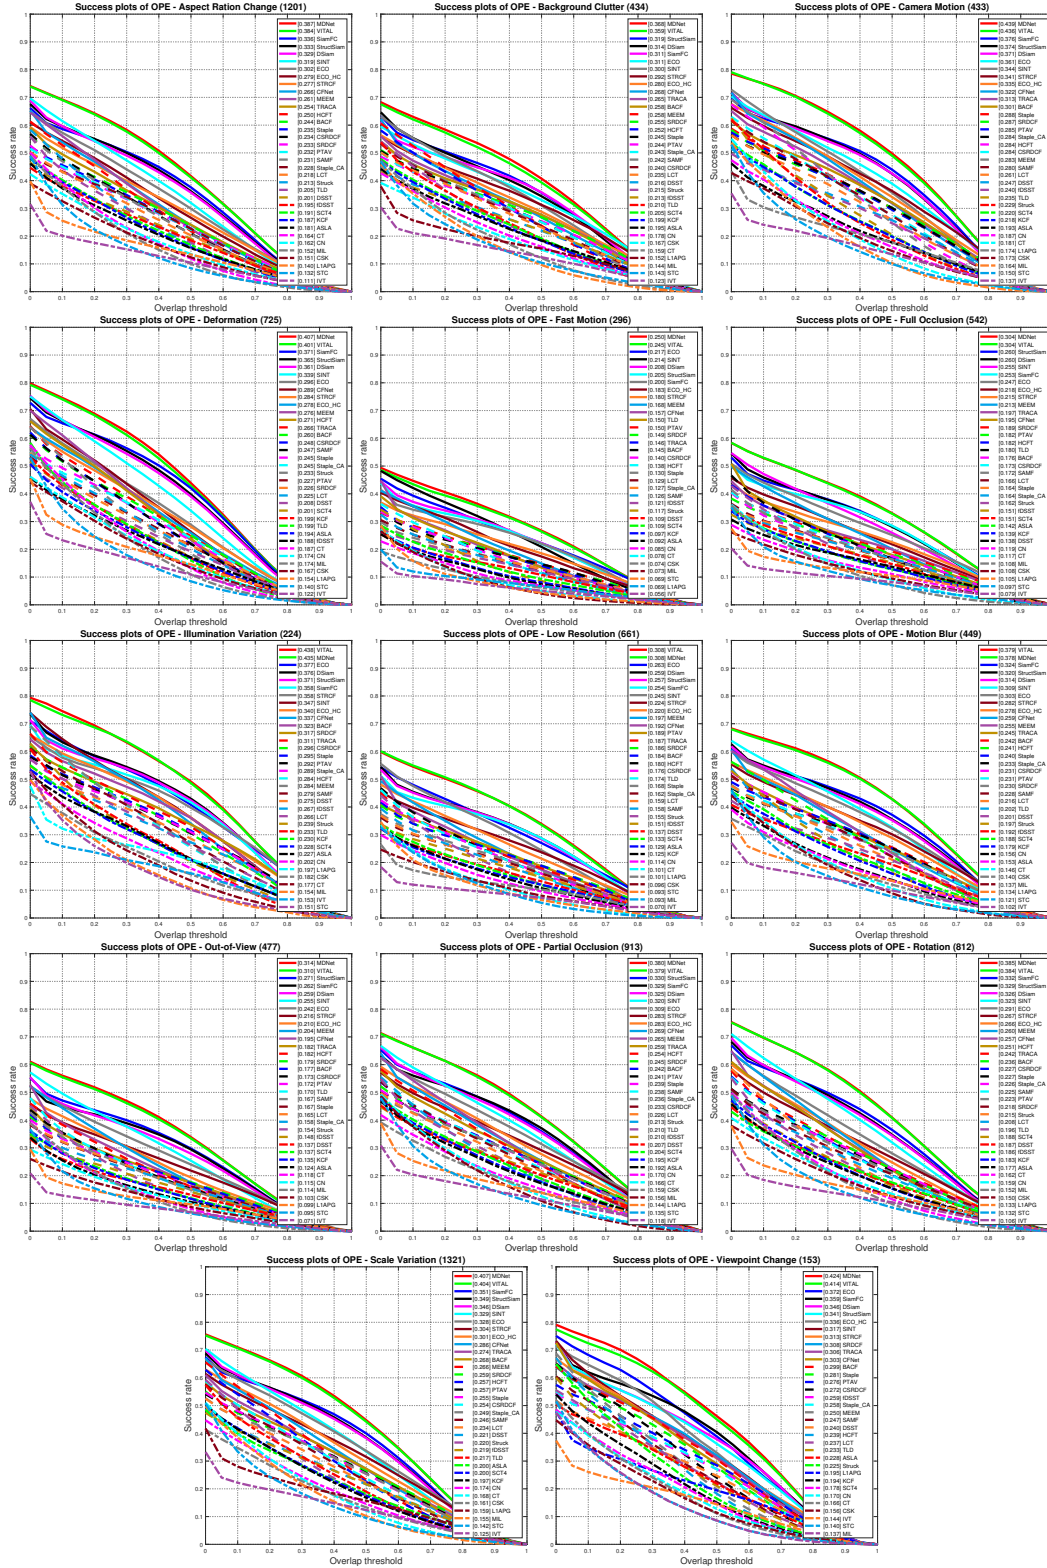

Figure 4. Performance of trackers on each attribute using success under protocol I. Best viewed in color.

#### 4. Detailed Attribute-based Performance under Protocol II

Fig. 5 shows the performance of trackers on each attribute using precision under protocol II.

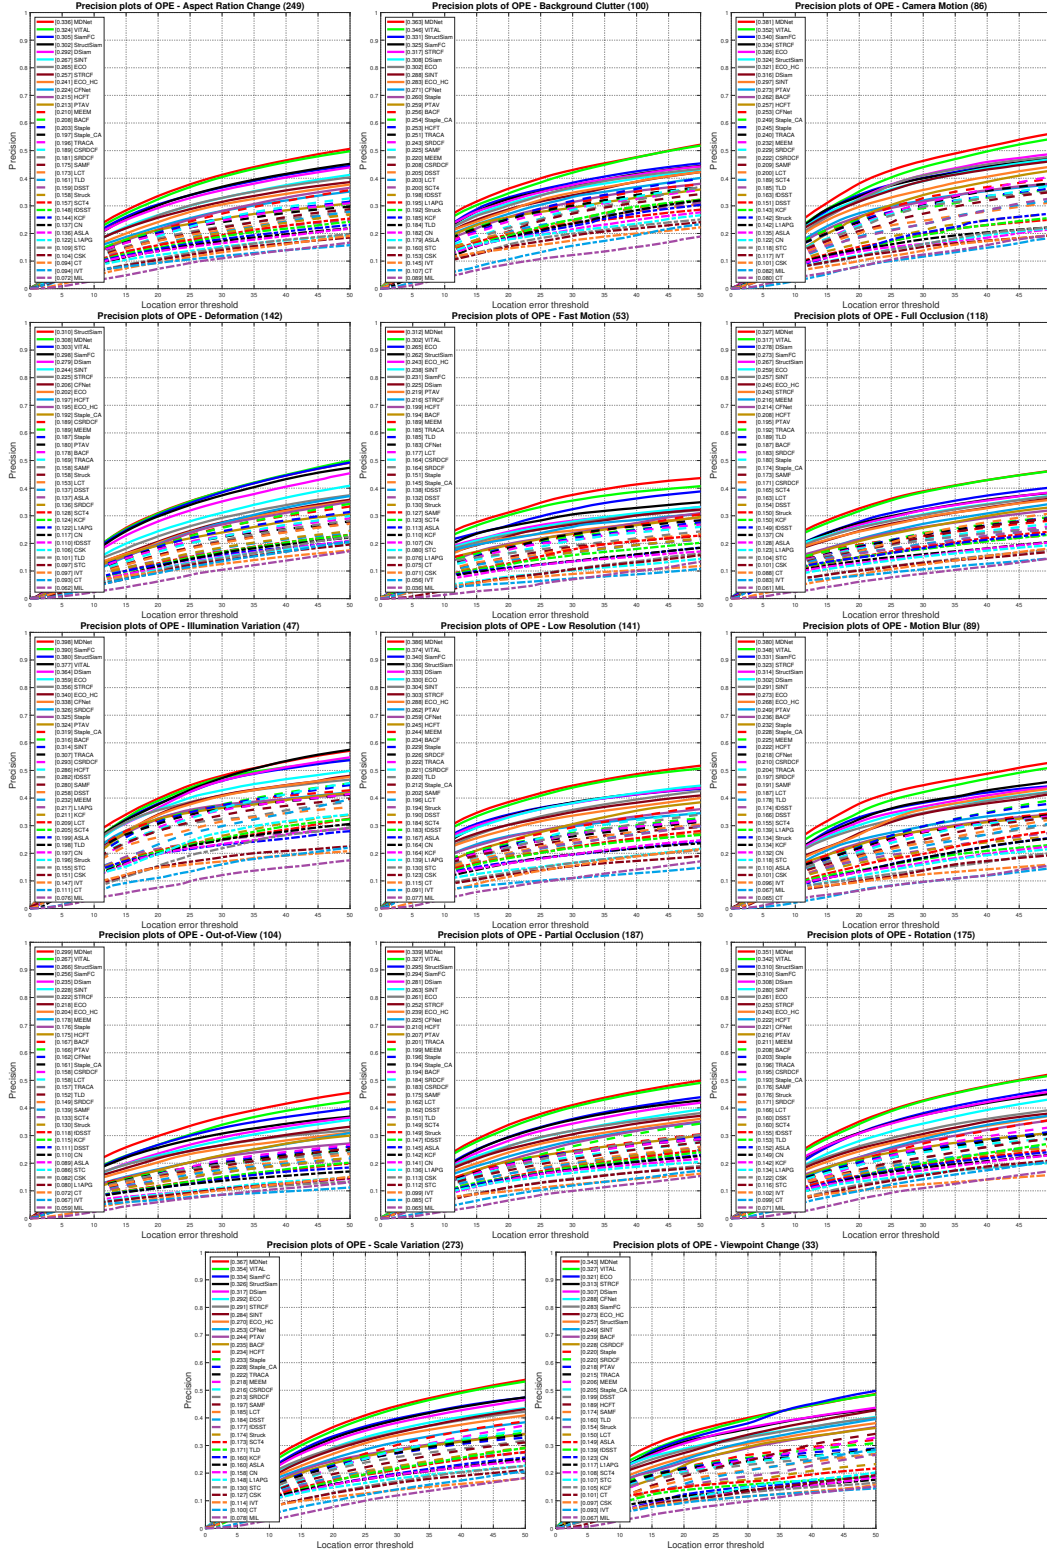

Figure 5. Performance of trackers on each attribute using precision under protocol II. Best viewed in color.

Fig. 6 shows the performance of trackers on each attribute using normalized precision under protocol II.

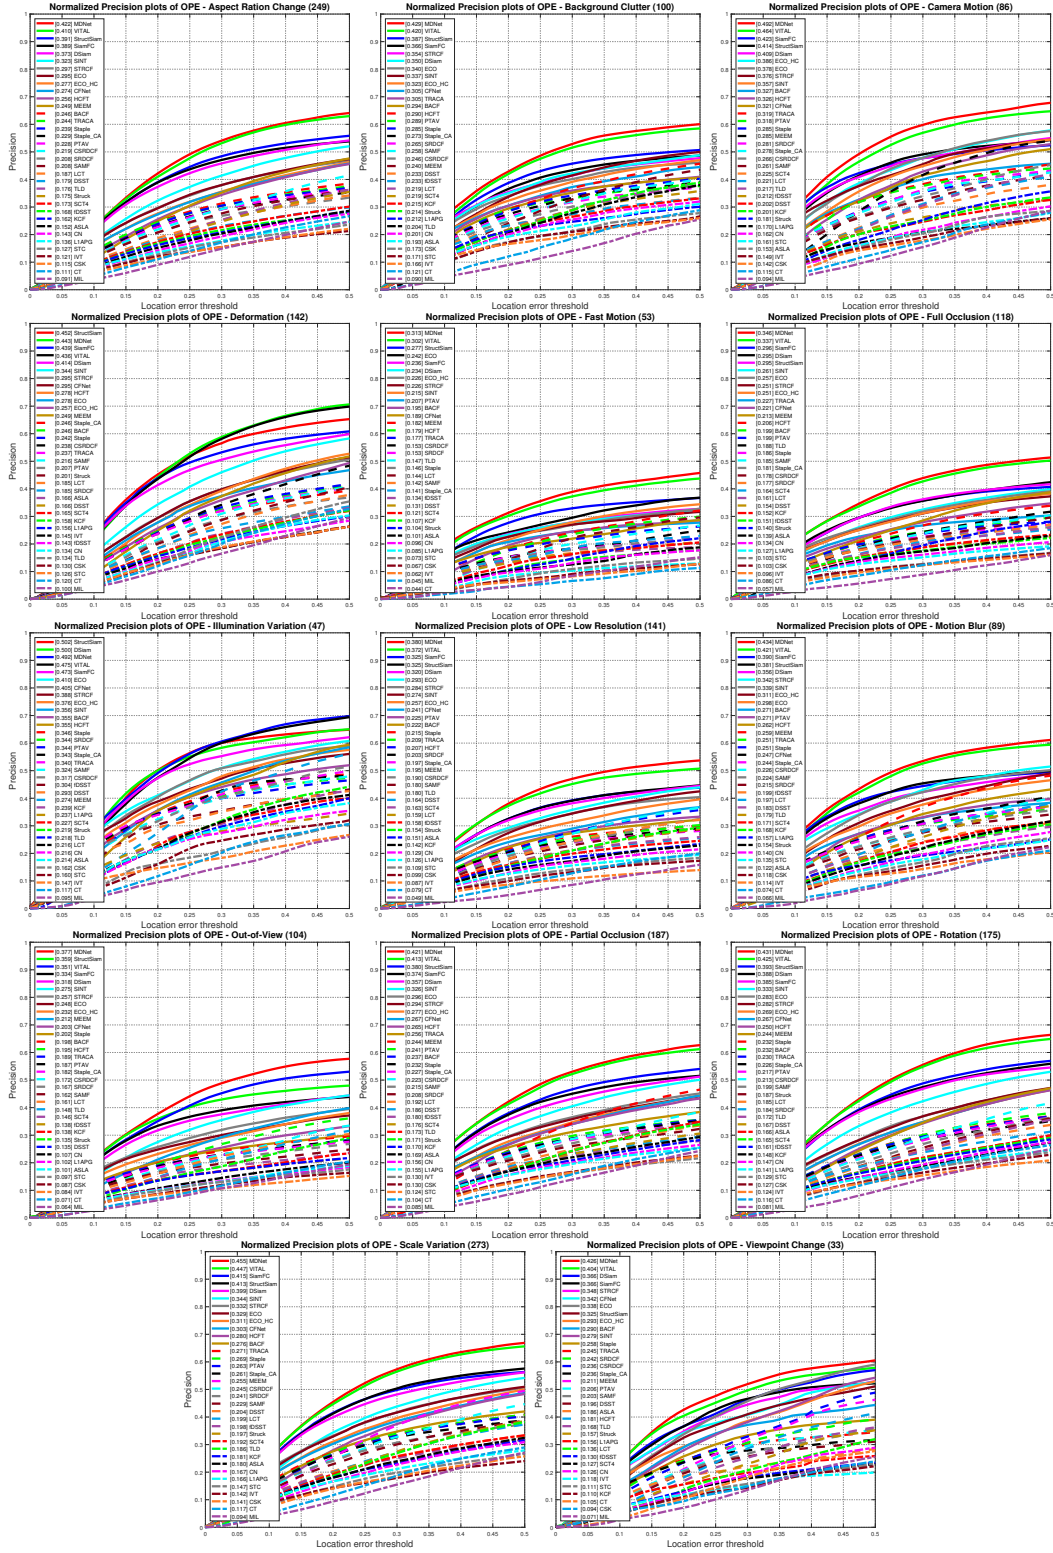

Figure 6. Performance of trackers on each attribute using precision under protocol II. Best viewed in color.



Fig. 7 shows the performance of trackers on each attribute using success under protocol II.

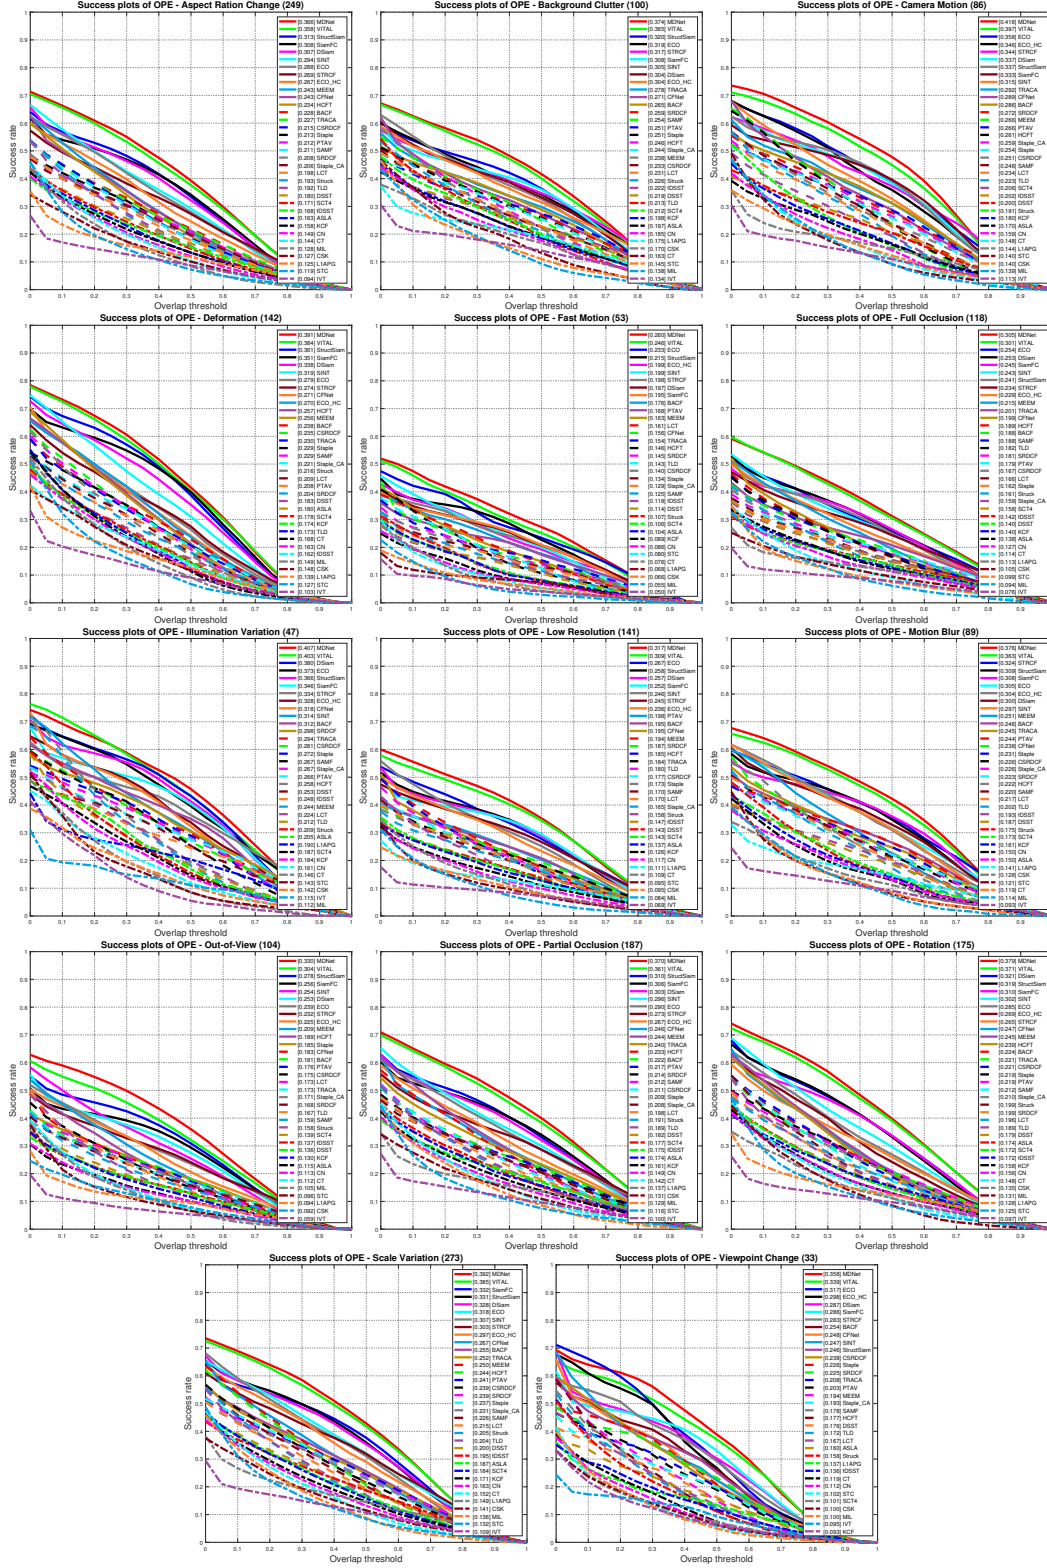

Figure 7. Performance of trackers on each attribute using success under protocol II. Best viewed in color.



## References

- [1] Jia Deng, Wei Dong, Richard Socher, Li-Jia Li, Kai Li, and Li Fei-Fei. Imagenet: A large-scale hierarchical image database. In *CVPR*, 2009. [2](#)
- [2] Hamed Kiani Galoogahi, Ashton Fagg, Chen Huang, Deva Ramanan, and Simon Lucey. Need for speed: A benchmark for higher frame rate object tracking. In *ICCV*, 2017. [1](#)
- [3] Matej Kristan et al. The visual object tracking vot2017 challenge results. In *ICCVW*, 2017. [1](#)
- [4] Annan Li, Min Lin, Yi Wu, Ming-Hsuan Yang, and Shuicheng Yan. Nus-pro: A new visual tracking challenge. *TPAMI*, 38(2):335–349, 2016. [1](#)
- [5] Pengpeng Liang, Erik Blasch, and Haibin Ling. Encoding color information for visual tracking: Algorithms and benchmark. *TIP*, 24(12):5630–5644, 2015. [1](#), [2](#)
- [6] Matthias Mueller, Neil Smith, and Bernard Ghanem. A benchmark and simulator for uav tracking. In *ECCV*, 2016. [1](#)
- [7] Yi Wu, Jongwoo Lim, and Ming-Hsuan Yang. Object tracking benchmark. *TPAMI*, 37(9):1834–1848, 2015. [1](#)
